# Supplementary material for: De-regulated STAT5A/miR-202-5p/USP15/Caspase-6 regulatory axis suppresses CML cell apoptosis and contributes to Imatinib resistance
Source: PubMed Central journal article supplement (PMC6969434; doi:10.1186/s13046-019-1502-7), 2020-01-17
Supplement: 13046_2019_1502_MOESM1_ESM.pdf [file 13046_2019_1502_MOESM1_ESM.pdf]

## Supplementary Material

A

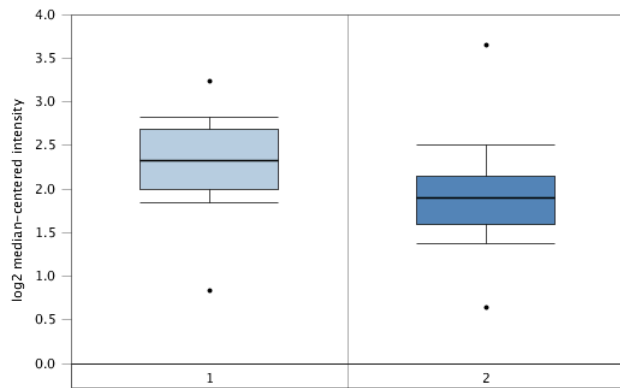

**Legend**

- 1. Peripheral Blood Mononuclear Cell (74)
- 2. Chronic Myelogenous Leukemia (76)

B

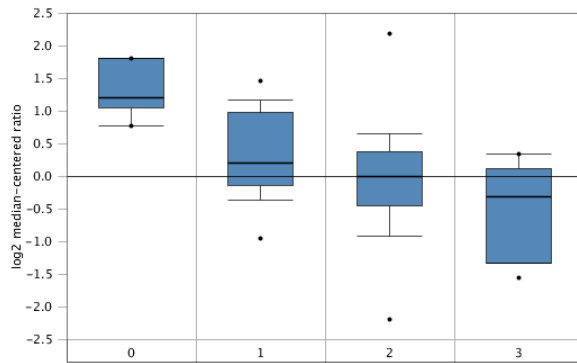

**Legend**

- 0. No value (6)
- 1. Acute Myeloid Leukemia (23)
- 2. B-Cell Acute Lymphoblastic Leukemia (87)
- 3. T-Cell Acute Lymphoblastic Leukemia (10)

**Supplementary Fig. 1** (A) OncoPrint was used to analyze the USP15 expression level in patients with CML and normal cells in TCGA. (B) OncoPrint was used to analyze the USP15 expression level in patients with AL and normal cells in TCGA.

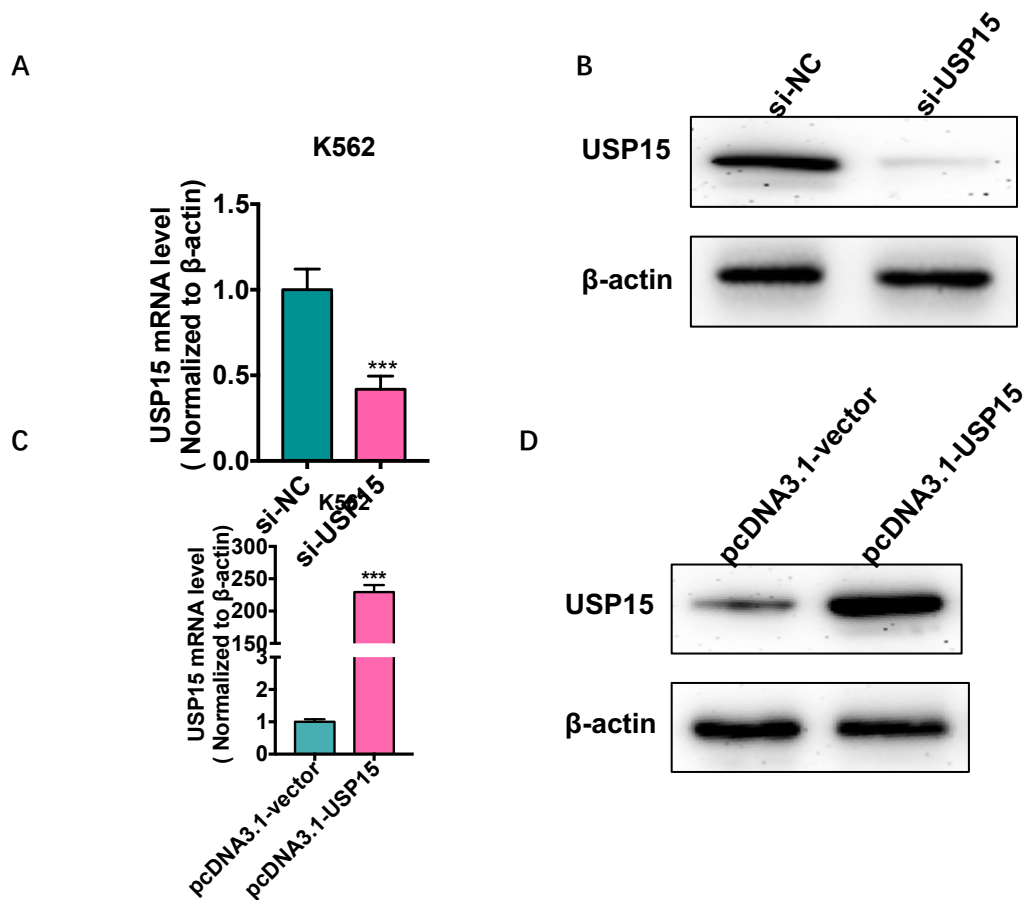

**Supplementary Fig. 2** (A) K562 cells were transfected with si-USP15 or si-NC. USP-15 mRNA level was test by qRT-PCR. \*\*\* $P < 0.001$  vs. si-NC. (B) K562 cells were transfected with si-USP15 or si-NC. Protein level of USP-15 was test by Western blot analysis. (C).K562 cells were transfected with USP15 overexpression vector pcDNA3.1-USP15 or empty vector. USP-15 mRNA level was test by qRT-PCR. \*\*\* $P < 0.001$  vs. pcDNA3.1 vector. (D).K562 cells were transfected with USP15 overexpression vector pcDNA3.1-USP15 or empty vector. Protein level of USP-15 was test by Western blot analysis.

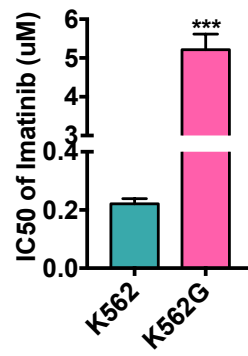

**Supplementary Fig. 3** K562 and K562G cells were treated with Imatinib in different concentrations for 48 h. Imatinib IC<sub>50</sub> was evaluated by CCK-8 assay. \*\*\* $P < 0.001$  vs K562 cell.

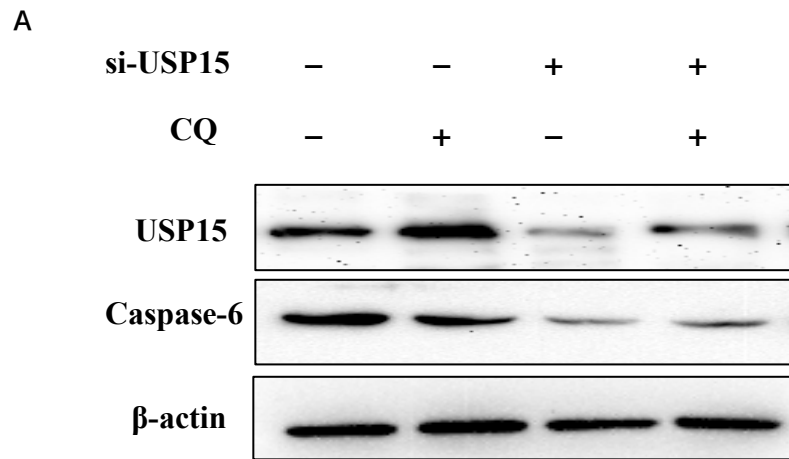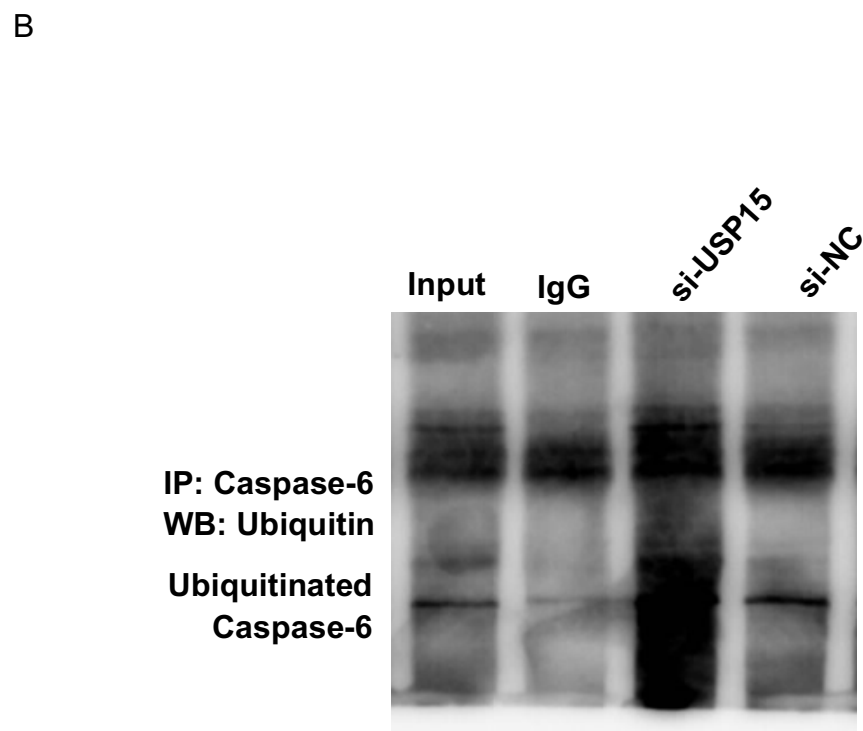

**Supplementary Fig. 4** (A) K562 cells were treated with CQ for 12h or not and then transfected with si-NC or si-USP15 for 24 h then. USP15 and Caspase-6 protein level was detected by Western blot analysis. (B) K562 cells were then transfected with si-NC or si-USP15 for 24 h then MG132 for 6 h. Co-immunoprecipitation (CoIP) assays were performed to detect the interaction between Ubiquitin and Caspase-6.

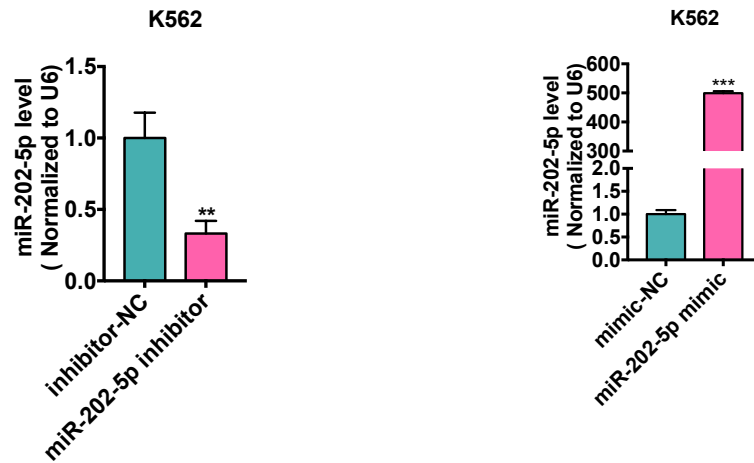

**Supplementary Fig. 5** (A) K562 cells were transfected with pre-miR-202-5p inhibitor or inhibitor-NC. Pre-miR-202-5p expression level was detected by qRT-PCR. \*\* $P < 0.01$  vs. inhibitor-NC. (B) K562 cells were transfected with miR-202-5p mimic or mimic-NC. miR-202-5p expression level was detected by qRT-PCR. \*\*  $P < 0.01$  vs. mimic-NC.

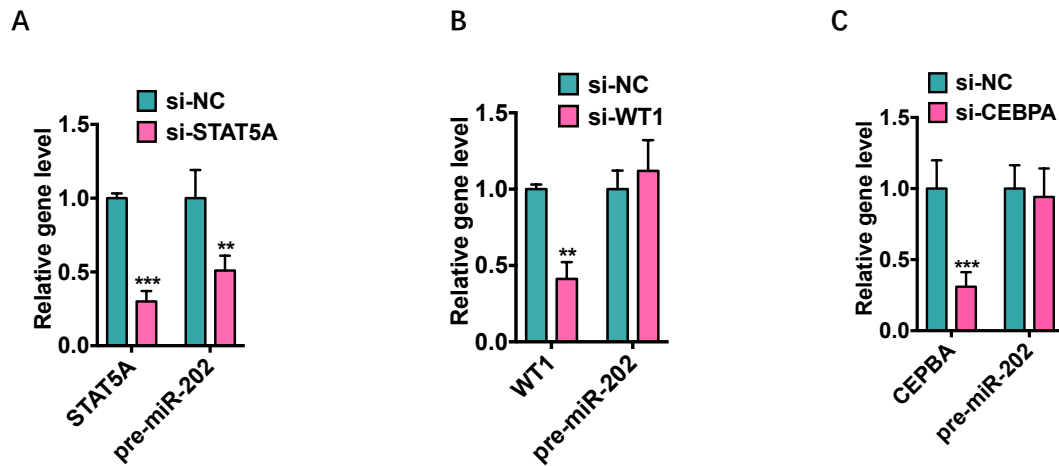

Supplementary Fig. 6 (A) K562 cells were transfected with si-STAT5A or si-NC . miR-202-5p and STAT5A expression levels were detected by qRT-PCR. \*\*  $P < 0.01$ , \*\*\*  $P < 0.001$  vs. si-NC. (B) K562 cells were transfected with si-WT1 or si-NC . miR-202-5p and WT1 expression levels were detected by qRT-PCR. \*\*  $P < 0.01$  vs. si-NC. (C) K562 cells were transfected with si-CEBPA or si-NC . miR-202-5p and CEBPA expression levels were detected by qRT-PCR. \*\* \* $P < 0.001$ , vs. si-NC.

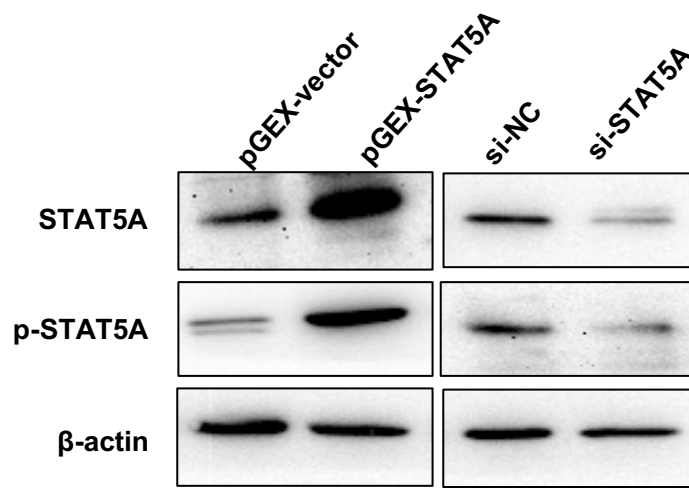

Supplementary Fig. 7 K562 cells were transfected with pGEX-STAT5, pGEX-vector, si-STAT5A and si-NC, respectively. Protein levels of STAT5A and p-STAT5A was detected by Western blot analysis.

**Supplementary Table. 1 Interaction Proteins with USP15 in CoIP-MS analysis**

| <b>Score</b> | <b>Mass</b> | <b>Name</b>                                        |
|--------------|-------------|----------------------------------------------------|
| 655          | 11360       | Histone H4                                         |
| 521          | 42052       | Actin, cytoplasmic 1                               |
|              | 13414       |                                                    |
| 82           | 5           | Serine/threonine-protein kinase Nek10              |
| 360          | 58415       | Alpha-amylase 1                                    |
| 238          | 83554       | Heat shock protein HSP 90-beta                     |
| 226          | 18386       | Selenoprotein F                                    |
|              | 11360       |                                                    |
| 176          | 2           | Ubiquitin carboxyl-terminal hydrolase              |
| 136          | 2220        | T-cell receptor alpha joining 56 (Fragment)        |
| 126          | 10463       | Polyubiquitin-B (Fragment)                         |
| 122          | 30759       | Apolipoprotein A-I                                 |
| 105          | 73920       | Stress-70 protein                                  |
| 95           | 58606       | Tubulin alpha chain                                |
|              | 22982       |                                                    |
| 85           | 7           | Myosin-10                                          |
| 79           | 11391       | Dermcidin                                          |
| 67           | 33859       | Caspase-6                                          |
| 57           | 49680       | Vimentin                                           |
| 56           | 13291       | Protein S100-A9                                    |
| 56           | 48195       | Elongation factor 1-alpha 1                        |
| 56           | 10885       | Protein S100-A8                                    |
| 55           | 38366       | Proto-oncogene serine/threonine-protein kinase mos |
| 55           | 19135       | Peroxiredoxin-1 (Fragment)                         |
| 53           | 26683       | Protein AMBP OS=Homo sapiens                       |
| 53           | 98164       | Inactive rhomboid protein 2                        |
| 52           | 59828       | ATP synthase subunit alpha, mitochondrial          |
| 51           | 38816       | Transcription factor AP-4                          |



**Supplementary Table. 2 Clinical Characteristics**

| <b>Characteristics</b>                        | <b>CML-CP<br/>(n=30)</b> | <b>Donors<br/>(n=30)</b> | <b>CML-AML<br/>(n=4)</b> | <b>CML-ALL<br/>(n=2)</b> |
|-----------------------------------------------|--------------------------|--------------------------|--------------------------|--------------------------|
| <b>Age(years),median(range)</b>               | 42(29-71)                | 42(29-71)                | 51(44-62)                | 56(52-60)                |
| <b>Male/Female,(n/n)</b>                      | 18/12                    | 18/12                    | 1/3                      | 1/1                      |
| <b>WBCs,×10<sup>9</sup>/L, median(range)</b>  | 249(39-405)              | 6.1( 4.9-9.3)            | 29.1(9.2-30.5)           | 36.6(30.4-42.8)          |
| <b>Hb level (g/L)</b>                         | 99(81-146)               | 139(121-155)             | 67(52-77)                | 61(51-71)                |
| <b>PLT , ×10<sup>9</sup>/L, median(range)</b> | 464(94-797)              | 221(104-312)             | 35(11-66)                | 22(14-30)                |
